# Supplementary material for: Identification of miRNA-mRNA Modules in Colorectal Cancer Using Rough Hypercuboid Based Supervised Clustering
Source: PubMed Central journal article supplement (PMC5318911; doi:10.1038/srep42809), 2017-02-21
Supplement: srep42809-s1.pdf [file srep42809-s1.pdf]

# **Identification of miRNA-mRNA Modules in Colorectal Cancer Using Rough Hypercuboid Based Supervised Clustering**

Sushmita Paul, Petra Lakatos, Arndt Hartmann, Regine Schneider-Stock,  
and Julio Vera

SREP-16-40454

```

% Mathematical model for the triple coherent feedforward,loop, in which hsa-miR-27a-3p represses
in parallel SP1, SP3 and p53,
% three transcription factors collectively promoting the expression of CDKN1A (a.k.a. p21)
% Model contained in "Identification of miRNA-mRNA Modules in Colorectal Cancer Using
% Rough Hypercuboid Based Supervised Clustering" (Paul et al. 2016)
%
%
% Model parameters
g1=0.25;          % assumed miR repression follows a power-law rate equation (PMID:
17399948)...
                % with mild single miRNA target represssion, such as target has basal
expression...
                % (Tgt=1) at miRNA level miR=1, and 80% of basal (Tgt=.8) at miR=100
X= 80;           % assumed like in g1
g2= 4.9;        % assumed p21 mRNA synthesis follows a hill-equation in the product
SP1*SP3*p53,...
                % such as p21 mRNA synthesis gets 10% of maximum for SP1*SP3*p53=0.25...
                % and 99% for SP1*SP3*p53=1
km= 0.39;       % assumed like in g2
kdsp1= -log(0.5)/6; % reference PMID: 19245816
kdsp3= -log(0.5)/4; % PMID: 17685427
kdp53= 1.7;     % PMID: 22010756
kdm2m= 0.9;    % PMID: 22010756
kdm2= 0.8;     % PMID: 22010756
kdp21m= 0.12;  % PMID: 22798498
kdp21= 1.39    % PMID: 22798498
%
%
% Input variables (representative values)
miR=1;         % Expression level for miR-27a-3p
DD=1;         % DNA damage
%
%
% Time-dependent variables
SP1=y(1); % SP1
SP3=y(2); % SP3
p53=y(3); % p53
M2m=y(4); % MDM2 mRNA
M2=y(5); % MDM2
p21m=y(6); % p21 mRNA
p21=y(7); % p21
%
%
% Model equations
dy(1)= kdsp1*(1 + miR/X).^g1 - kdsp1*SP1; % SP1' (normalized)
dy(2)= kdsp3*(1 + miR/X).^g1 - kdsp3*SP3; % SP3' (normalized)
dy(3)= kdp53*DD*(1 + miR/X).^g1 - kdp53*M2*p53; % p53' (normalized)
dy(4)= kdm2m*p53 - kdm2m*M2m; % M2m' (normalized)
dy(5)= kdm2*M2m - kdm2*M2; % M2' (normalized)
dy(6)= kdp21m*(SP1*SP3*p53).^g2/(km.^g2...
+ (SP1*SP3*p53).^g2) - kdp21m*p21m; % p21m'(normalized)
dy(7)= kdp21*p21m - kdp21*p21; % p21' (normalized)

```
